# Supplementary material for: Slc25a17 Gene Trapped Mice: PMP34 Plays a Role in the Peroxisomal Degradation of Phytanic and Pristanic Acid
Source: PubMed Central journal article supplement (PMC7106852; doi:10.3389/fcell.2020.00144), 2020-03-24
Supplement: Data_Sheet_4.pdf [file Data_Sheet_4.pdf]

## Supplementary Tables S1-S2.

**Table S1. Primers and vectors (relevant restriction sites are underlined)**

| PCR primers                |                         |                                                              |
|----------------------------|-------------------------|--------------------------------------------------------------|
| target                     | name primer(s)          | sequence                                                     |
| <i>Slc25a17</i> (intron 1) | <i>MmPMP34</i> -in1-s-a | 5'-AGCTTGGTAACCAGTGTGG                                       |
|                            | <i>MmPMP34</i> -in1-s-b | 5'-CTGGCACCTAGCACCTCTTC                                      |
|                            | <i>MmPMP34</i> -in1-s-c | 5'-TATCCAATGCCCTCTTCTGG                                      |
|                            | <i>MmPMP34</i> -in1-s-d | 5'-TCCTTCCCTGGAACCCTTCTT                                     |
|                            | <i>MmPMP34</i> -in1-s-e | 5'-CCCCTCCTACAGAGAGACACC                                     |
|                            | <i>MmPMP34</i> -in1-s-f | 5'-CAAGCTTCCCAGAACAGAGG                                      |
|                            | <i>MmPMP34</i> -in1-s-g | 5'-GCACAAACACCATGACCAAG                                      |
|                            | <i>MmPMP34</i> -in1-s-h | 5'-CTTGGCTTTCCAGCTGTAGG                                      |
|                            | <i>MmPMP34</i> -in1-s-i | 5'-CCAGAGGCTGCTACATTTC                                       |
|                            | <i>MmPMP34</i> -in1-s-j | 5'-CTTTAGCCTCTGGGCTCTCC                                      |
|                            | <i>MmPMP34</i> -in1-s-k | 5'-AGGCAGGTTGGGAATTTAGC                                      |
|                            | <i>MmPMP34</i> -in1-r-e | 5'-CTCTTCCGAAGGTCCTGAGC                                      |
| βgeo                       | Gal-s                   | 5'-CGAATACCTGTTCCGTCATAGC                                    |
|                            | Gal-r                   | 5'-AGTGGCAACATGGAAATCG                                       |
|                            | GAL-3s                  | 5'-CGAATACCTGTTCCGTCATAGCG                                   |
|                            | GAL-3r                  | 5'-ACCACTACCATCAATCCGGTAGG                                   |
| PARP1                      | HsPARP1-1s-EP           | 5'-AAGAATTC <u>ACTGCAGCTTCTGGAGGACGACAAG</u>                 |
|                            | HsPARP1-2r-XB           | 5'-AACTCGAGATCTAAAGTTTGGACTTCCACAGGGAGGTCTTAAAAATTG          |
| real time PCR primers      |                         |                                                              |
| target                     | name primer(s)          | sequence                                                     |
| <i>Slc25a17</i>            | PMP34-1                 | fw 5'-GGCCTCTGTGCTGTCCTACGAAAG; rev 5'- GACTCCGCTCTGGGTGGTAA |
| <i>Slc25a17</i>            | PMP34-2                 | fw 5'-TGGCACCATGGCCTCTGT; rev 5'-AGTGTGACTGCCATGACAGTGTT     |

|                     |                                 |                                                                                                                                                                                                                                                    |
|---------------------|---------------------------------|----------------------------------------------------------------------------------------------------------------------------------------------------------------------------------------------------------------------------------------------------|
|                     |                                 | probe TCCTACGAAAGTCTGGTACACGCCGTGGCCGGAGCCGTG                                                                                                                                                                                                      |
| <i>Cat</i>          | Catalase                        | fw 5'-CGCAGAGACCTGATGTCCTGA; rev 5'- CCCC GCGGTCATGAATATTA<br>probe 5'-CACCGGAGGCGGGAACCCAATA                                                                                                                                                      |
| <i>Acox1</i>        | ACOX1                           | fw 5'-CACGCACATCTTGGATGGTAGT; rev 5'-<br>TTCGTCAGAATCAAGTTCTCGATT<br>probe 5'-ACACCCGGCGCCGTCGAG                                                                                                                                                   |
| <i>Ehhadh</i>       | MFP1                            | fw 5'-GCTGGAGCCCAGTGACTACCT; rev 5'-CCAAGCTTTGCCATTCTTTCA<br>probe 5'-TGGTTGCCAGGGAAGCCCTC                                                                                                                                                         |
| <i>Cyp4A10</i>      | CytP450A10                      | fw 5'-GCCAAATCCAGAGGTGTTTGA; rev 5'- AGCAAATTGTTTCCCAATGCA<br>probe 5'-AGACTCTCCCCGACACAGCCACTCATTC                                                                                                                                                |
| <i>Cpt1β</i>        | CPT1β                           | fw 5'-CTGAGACACATCACCGTCTGGAA; rev 5'- CACCCCTAAGGATGCCATTCT<br>probe 5'- CAACTCCTGGAAGAAACGCCTTATTCGAATC                                                                                                                                          |
| <i>Actb</i>         | actin beta                      | fw 5'-AGAGGGAAATCGTGCGTGAC; rev 5'-CAATAGTGATGACCTGGCCGT<br>probe 5'-CACTGCCGCATCCTCTTCCTCCC                                                                                                                                                       |
| vectors             |                                 |                                                                                                                                                                                                                                                    |
| <b>name</b>         | <b>insert</b>                   | <b>generation, reference or source</b>                                                                                                                                                                                                             |
| pCR®-XL-TOPO        | --                              | Invitrogen                                                                                                                                                                                                                                         |
| pCMVβ               | β-galactosidase                 | Clontech                                                                                                                                                                                                                                           |
| pCMV-Tag2B          |                                 | Stratagene                                                                                                                                                                                                                                         |
| pTW45               | full length mouse<br>PMP34 cDNA | Wylin T, Baes M, Brees C, Mannaerts GP, Fransen M, Van Veldhoven PP (1998) Eur J Biochem 258, 332-338; primer amplified open reading frame inserted into <i>EcoRI/NotI</i> restricted pBluescript; Wylin T and Van Veldhoven PP, unpublished data. |
| pRSVL               | luciferase                      | de Wet JR, Wood KV, DeLuca M, Helinski DR, Subramani S. (1987) Mol Cell Biol. 7, 725-737.                                                                                                                                                          |
| pGL3-CMV-luciferase | luciferase                      | derived from pGL3 (Promega), expression controlled by CMV promotor; Ir. N. Hersmus (Laboratory for Neurobiology, K.U.Leuven)                                                                                                                       |
| pRSV-SV40T          | SV40 large T antigen            | S. Subramani (University of California, San Diego, USA)                                                                                                                                                                                            |
| pGT1.8IRESβGeo(S)   | βgeo                            | W. Skarnes (Wellcome Trust Sanger Institute, Cambridge, UK)                                                                                                                                                                                        |
| pMF1706             | roGFP-SKL                       | Ivashchenko O, Van Veldhoven PP, Brees C, Ho YS, Terlecky SR, Fransen M (2011) Mol Biol Cell 22, 1440–1451.                                                                                                                                        |



**Table S2. Plasmalogen content of tissues of wild type and PMP34 knock out mice.**

Plasmalogens were analyzed in lipid extracts of tissues obtained from age matched male adult mice fed a standard (-) or phytol (+) enriched diet, and related to the total amount of phospholipids as described in the Method section. Values are mean  $\pm$  SD when measurements were performed on tissues derived from two mice, otherwise represent determinations on a single mouse.

|          |  | plasmalogens (nmol/ $\mu$ mol phospholipid) |                |                 |                |
|----------|--|---------------------------------------------|----------------|-----------------|----------------|
| genotype |  | wild type                                   |                | PMP34 knock out |                |
| phytol   |  | -                                           | +              | -               | +              |
| liver    |  | 8.97 $\pm$ 0.5                              | 9.18 $\pm$ 0.4 | 8.93 $\pm$ 0.5  | 8.30 $\pm$ 2.7 |
| cerebrum |  | 229                                         | 256 $\pm$ 22.0 | 247             | 241 $\pm$ 12.0 |
| heart    |  | 158                                         | 123            | 162             | 91.6 $\pm$ 7.8 |
